# Supplementary material
Source: Springer Nature journal article supplement (https://www.springermedizin.de/resource/supplementary/12889_2012_5336_MOESM6_ESM.pdf/9495124)

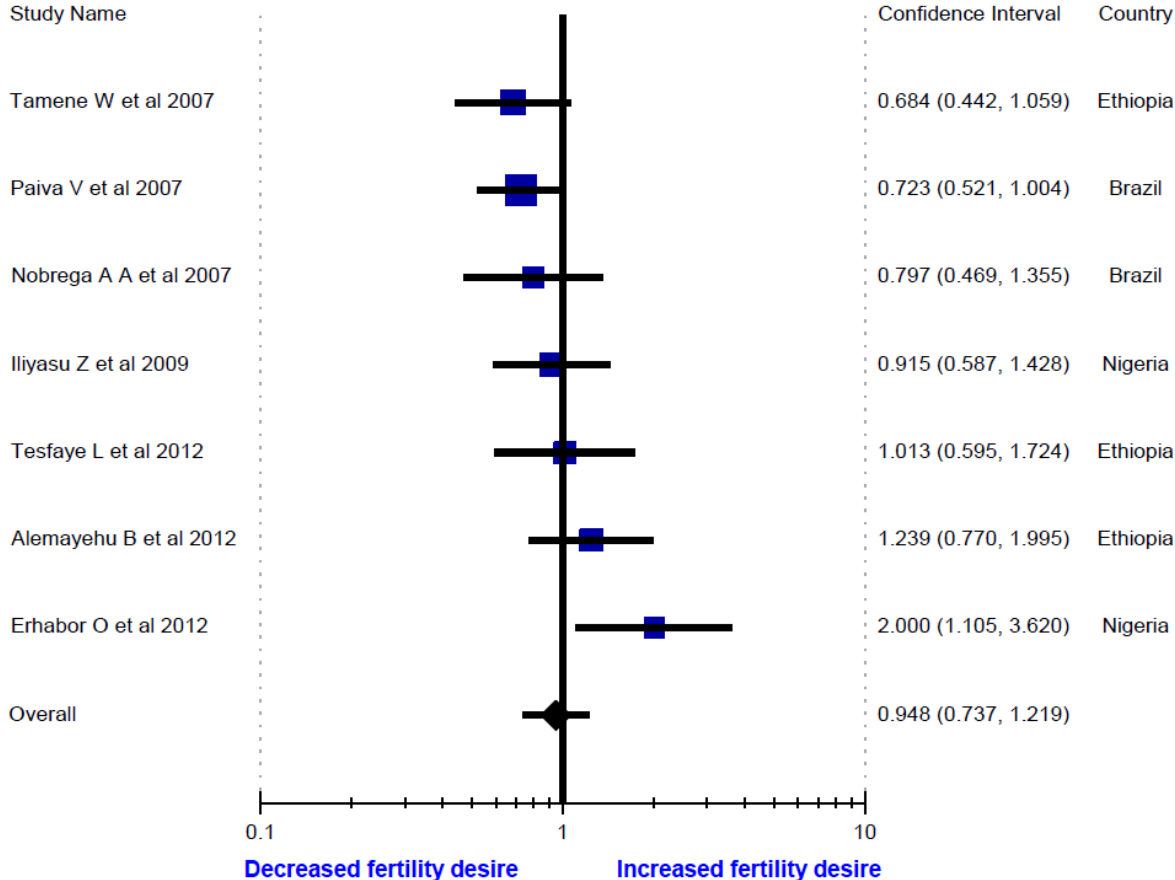

| Heterogeneity test |                |      |     |           |
|--------------------|----------------|------|-----|-----------|
| Tau <sup>2</sup>   | I <sup>2</sup> | Q    | DF  | P-val (Q) |
| 0.058              | 51.2%          | 12.3 | 6.0 | 0.056     |

Supplement: MOESM6 [file 9495124]
